# Supplementary material for: The phenotypic and genetic spectrum of patients with heterozygous mutations in cyclin M2 (CNNM2)
Source: PubMed Central journal article supplement — Hum Mutat. 2021 Mar 1;42(4):473–86. doi: 10.1002/humu.24182 (PMC8248058; doi:10.1002/humu.24182), 2021-03-01
Supplement: HUMU-42-473-s001.pdf [file HUMU-42-473-s001.pdf]

## SUPPLEMENTARY MATERIALS

### **Phenotypic and genetic spectrum of patients with heterozygous mutations in Cyclin M2 (CNNM2)**

Gijs A.C. Franken<sup>1</sup>, Dominik Müller<sup>2</sup>, Cyril Mignot<sup>3</sup>, Boris Keren<sup>4</sup>, Jonathan Lévy<sup>5</sup>, Anne-Claude Tabet<sup>5</sup>, David Germanaud<sup>6</sup>, María-Isabel Tejada<sup>7,8</sup>, Hester Y. Kroes<sup>9</sup>, Rutger A.J. Nievelstein<sup>10</sup>, Elise Brimble<sup>11</sup>, Maria Ruzhnikov<sup>11</sup>, Felix Claverie-Martin<sup>12</sup>, Maria Szczepańska<sup>13</sup>, Martin Čuk<sup>14</sup>, Femke Latta<sup>1</sup>, Martin Konrad<sup>15</sup>, Luis A. Martínez-Cruz<sup>16</sup>, René J.M. Bindels Bindels<sup>1</sup>, Joost G.J. Hoenderop<sup>1</sup>, Karl-Peter Schlingmann<sup>\*15</sup>, Jeroen H.F. de Baaij<sup>\*1</sup>

**SUPPLEMENTARY FIGURES**

**Supplementary figure 1**

CNNM2-p.Leu48Pro

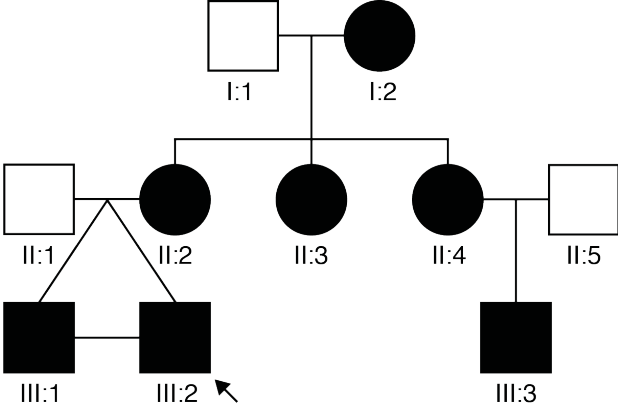

CNNM2p.Tyr314X

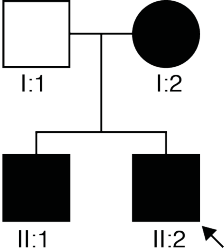

The inheritance pattern of patients carrying CNNM2-p.Leu48Pro (left) and p.Tyr314\* (right) mutations depicted in pedigrees. Arrows indicate proband patients.

Supplementary figure 2

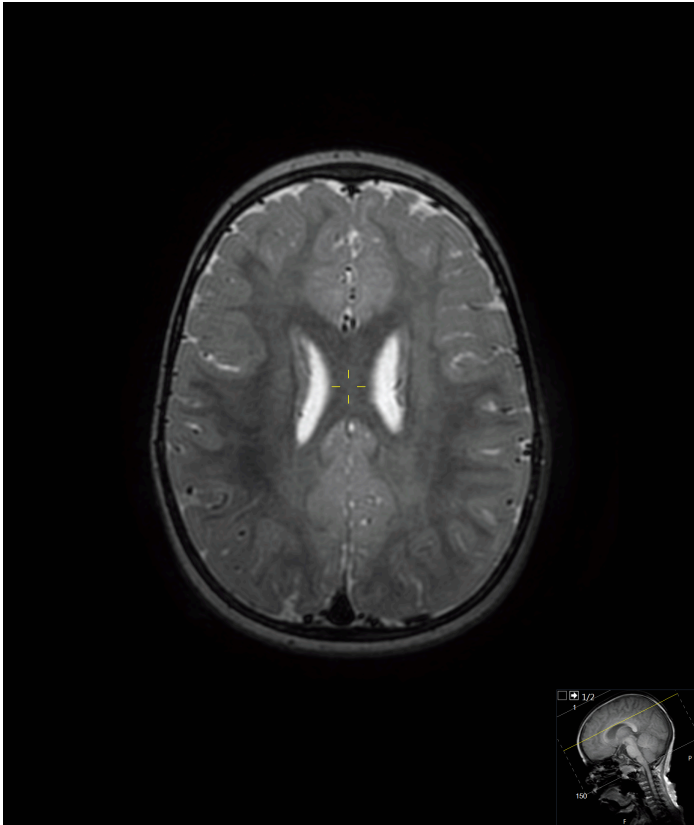

Magnetic resonance imaging studies of patient carrying the CNNM2-p.Arg797\* mutation.

## Supplementary table 1

Phenotypic overview of patients with novel non-pathogenic CNNM2 mutations

| Proband                                                     | 10                                                  | 11                    |
|-------------------------------------------------------------|-----------------------------------------------------|-----------------------|
| <b>Genetic Findings</b>                                     |                                                     |                       |
| <b>DNA</b>                                                  | NM_017649.4:c.1016G>A                               | NM_017649.4:c.1094C>T |
| <b>Protein</b>                                              | p.Gly339Asp                                         | p.Ser365Phe           |
| <b>Genetic diagnosis</b>                                    | Next-Generation-Sequencing panel for hypomagnesemia | Exome sequencing      |
| <b>General Parameters</b>                                   |                                                     |                       |
| <b>Gender</b>                                               | F                                                   | M                     |
| <b>Inherited</b>                                            | De novo                                             | De novo               |
| <b>Ethnicity</b>                                            | Caucasian                                           | Caucasian             |
| <b>Age of manifestation</b>                                 | 10 years                                            | Birth                 |
| <b>Body mass index (percentile)</b>                         | 19.3 (P50-P85)                                      | 13.83 (<P3)           |
| <b>eGFR (mL/min)</b>                                        | 136                                                 | N/A                   |
| <b>Neurological manifestations</b>                          |                                                     |                       |
| <b>Seizures</b>                                             | N                                                   | Y                     |
| <b>Brain Malformations</b>                                  | N/A                                                 | Y                     |
| <b>Intellectual disability</b>                              | Y                                                   | Y                     |
| <b>Speech/Communication defects</b>                         | N/A                                                 | Delayed               |
| <b>ASD</b>                                                  | N/A                                                 | N                     |
| <b>Motor skill defects</b>                                  | N/A                                                 | Delayed               |
| <b>Electrolyte levels</b>                                   |                                                     |                       |
| <b>Serum Na<sup>+</sup> (mmol/L)</b>                        | 140                                                 | 142                   |
| <b>Serum K<sup>+</sup> (mmol/L)</b>                         | 3.7                                                 | 3.5                   |
| <b>Serum Mg<sup>2+</sup> (mmol/L)</b>                       | 0.49                                                | 0.7                   |
| <b>Serum Ca<sup>2+</sup> (mmol/L)</b>                       | 2.42                                                | 1.25 (ionized)        |
| <b>Urinary Mg<sup>2+</sup> (%FE)</b>                        | 11.2                                                | N/A                   |
| <b>Mg<sup>2+</sup> supplementation</b>                      |                                                     |                       |
| <b>Mg<sup>2+</sup> supplementation</b>                      | Oral                                                | N/A                   |
| <b>Serum Mg<sup>2+</sup> after supplementation (mmol/L)</b> | N/A                                                 | N/A                   |

Y = yes, N = no, N/A = unknown. FE = fractional excretion in %. ASD = autism spectrum disorder.

## Supplementary table 2

Phenotypic overview of clinically affected family members of the index patient carrying the CNNM2-p.Leu48Pro variant, described in supplementary figure 1.

| <b>Patient</b>                                        | <b>III:1</b>                | <b>III:3</b>  | <b>II:2</b>   | <b>II:4</b>   | <b>II:5</b>   | <b>I:2</b>    |
|-------------------------------------------------------|-----------------------------|---------------|---------------|---------------|---------------|---------------|
| <i>Gender</i>                                         | M                           | M             | F             | F             | F             | F             |
| <i>Seizures</i>                                       | N                           | N             | N/A           | N/A           | N/A           | N/A           |
| <i>Motor skills defects</i>                           | N/A                         | N/A           | Y             | N/A           | N/A           | N/A           |
| <i>Speech/Communication</i>                           | Dyslexia<br>and<br>dyslalia | Dyslalia      | Dyslexia      | N/A           | N/A           | N/A           |
| <i>Serum Mg<sup>2+</sup> (mmol/L)</i>                 | 0.53                        | 0.66          | 0.58-<br>0.66 | 0.58-<br>0.66 | 0.58-<br>0.66 | 0.58-<br>0.66 |
| <i>Urinary Mg<sup>2+</sup> (mmol/L)</i>               | 13.2                        | 8.4           | N/A           | N/A           | N/A           | N/A           |
| <i>Serum Mg<sup>2+</sup> after suppl<br/>(mmol/L)</i> | 0.49-<br>0.66               | 0.58-<br>0.62 | N/A           | N/A           | N/A           | N/A           |

Y = yes, N = no, N/A = unknown. Suppl = supplementation.

Full correction by Mg<sup>2+</sup> supplementation was defined as increasing serum Mg<sup>2+</sup> levels to normal range (0.70 – 1.05 mmol/L).

### Supplementary table 3

Primers used for mutagenesis. For the mutants p.Tyr314X and p.Arg797X reverse primers were used to build in a HA-tag right before the pre-mature stop codon.

| Primer mutagenesis                           | Sequence (5'-3')                                                                  |
|----------------------------------------------|-----------------------------------------------------------------------------------|
| mCNNM2-Leu48Pro Fwd<br>mCNNM2-Leu48Pro Rev   | CAGCTGCGGGCCGGCCGCTGCCGCTGCTACTG<br>CAGTAGCAGCGGCAGCGGCCGGCCCGCAGCTG              |
| mCNNM2-Tyr314X Fwd<br>mCNNM2-314-HAX Rev     | CGGCTAGCGCCACCATGATTGG<br>CCGCTCGAGCTATGCGTAGTCTGGCACGTCGTATGGGTAGTTGCCCTGCCTGCC  |
| mCNNM2-Leu321del Fwd<br>mCNNM2-Leu321del Rev | CTGTGCTCGCTGCTGGGCAACGTAAGTGGTC<br>GACCAGTACGTTGCCAGCAGCGAGCACAG                  |
| mCNNM2-Val324Met Fwd<br>mCNNM2-Val324Met Rev | CTGCTGCTGGGCAACATGCTGGTCAACACCACG<br>CGTGGTGTTGACCAGCATGTTGCCAGCAGCAG             |
| mCNNM2-Ser365Phe Fwd<br>mCNNM2-Ser365Phe Rev | CCCAAGCCATCTGCTTCCGACACGGCCTGGC<br>GCCAGGCCGTGTCGGAAGCAGATGGCTTGGG                |
| mCNNM2-Leu418Pro Fwd<br>mCNNM2-Leu418Pro Rev | GAAAAACTGCTGGAGATGCCCGGGTTACTGACCC<br>GGGTCAGTAACCCGGGGCATCTCCAGCAGTTTTTC         |
| mCNNM2-Ser795Leu Fwd<br>mCNNM2-Ser795Leu Rev | CTACATCCCTGACTACTTAGTACGAGCCCTCTC<br>GAGAGGGCTCGTACTAAGTAGTCAGGGATGTAG            |
| mCNNM2-Arg797X Fwd<br>mCNNM2-Arg797-HAX Rev  | CGGCTAGCGCCACCATGATTGG<br>CCGCTCGAGCTATGCGTAGTCTGGCACGTCGTATGGGTATACTGAGTAGTCAGGG |

#### Supplementary table 4

Primers for building in FLAG-tag at N-terminus.

|                     |                                                                |
|---------------------|----------------------------------------------------------------|
| FLAG-<br>mCNNM2 Fwd | CGGCTAGCGCCACCATGGACTACAAGGATGACGATGACAAGATTG<br>GCTGTGGCGCTTG |
| mCNNM2-HA<br>Rev    | GTGGCGCGCCGCCATCTTCCAAG                                        |

### Supplementary table 5

Components of the  $^{25}\text{Mg}^{2+}$ -uptake buffer

| Components         | Concentration (mM) |
|--------------------|--------------------|
| Sodium chloride    | 120                |
| Potassium chloride | 5                  |
| Calcium chloride   | 0.5                |
| Sodium diphosphate | 0.5                |
| Sodium disulfate   | 0.5                |
| HEPES/NaOH pH 7.5  | 15                 |



### Supplementary table 6

Components of cell lysis buffer for protein extraction

| Components                     | Concentration |
|--------------------------------|---------------|
| Tris-HCl pH 7.5                | 50 mM         |
| EGTA                           | 1 mM          |
| EDTA                           | 1 mM          |
| Triton-X100                    | 1% (v/v)      |
| Sodium glycerophosphate        | 10 mM         |
| Sodium orthovanadate           | 1 mM          |
| Sodium Fluoride                | 50 mM         |
| Sodium pyrophosphate           | 10 mM         |
| Sucrose                        | 270 mM        |
| Sodium chloride                | 150 mM        |
| Peptatin                       | 1 µg/mL       |
| Phenylmethanesulfonyl fluoride | 1 mM          |
| Leupeptin                      | 5 µg/mL       |
| Aproptin                       | 5 µg/mL       |

### Supplementary table 7

*In silico* prediction of identified CNNM2 mutations using the Combined Annotation Dependent Depletion tool GRCh37 v1.6 (<https://cadd.gs.washington.edu>) to obtain PolyPhen-2, SIFT, and CADD scores. PolyPhen-2 scores  $\geq 0.4$ , SIFT-scores  $\leq 0.05$ , and CADD-scores  $\geq 15$  were considered as deleterious.

| Variant     | PolyPhen-2 |                      | SIFT  |             | CADD  |                          |
|-------------|------------|----------------------|-------|-------------|-------|--------------------------|
|             | Score      | Effect               | Score | Effect      | Score | Effect                   |
| p.Leu48Pro  | 0.043      | Benign               | 0.26  | Tolerated   | 21.1  | Moderate:<br>Deleterious |
| p.Val324Met | 0.953      | Probably<br>damaging | 0.00  | Deleterious | 28.2  | Deleterious              |
| p.Gly339Asp | 0.905      | Probably<br>damaging | 0.01  | Deleterious | 28.3  | Deleterious              |
| p.Ser365Phe | 0.791      | Possibly<br>damaging | 0.00  | Deleterious | 28.4  | Deleterious              |
| p.Leu418Pro | 0.999      | Probably<br>damaging | 0.00  | Deleterious | 28.5  | Deleterious              |
| p.Ser795Leu | 0.998      | Probably<br>damaging | 0.00  | Deleterious | 29.9  | Deleterious              |
